# Supplementary material for: Multi-Drug Resistant Staphylococcus aureus Carriage in Abattoir Workers in Busia, Kenya
Source: MDPI journal article supplement (doi:10.3390/antibiotics11121726), 2022-12-01
Supplement: s1 [file s1]

Supplementary **Table S1**. Sequence types of MSSA and MRSA strains isolated from nasal of HIV positive and negative abattoir workers Busia County

| Sequence types | Total number n=126 (%) | Number isolated from HIV+ abattoir workers n=27 (%) | Number isolated from HIV-Abattoir workers n=99 (%) |
|----------------|------------------------|-----------------------------------------------------|----------------------------------------------------|
| ST152          | 43 (34.1%)             | 8 (29.6%)                                           | 35 (35.4%)                                         |
| ST8            | 19 (15.1%)             | 11 (40.7%)                                          | 8 (8.1%)                                           |
| ST72           | 9 (7.1)                |                                                     | 9 (9.1%)                                           |
| ST80           | 7 (5.6%)               |                                                     | 7 (7.1%)                                           |
| ST22           | 5 (4.0%)               | 1 (3.7%)                                            | 4 (4.1%)                                           |
| ST1            | 4 (3.2%)               | 1 (3.7%)                                            | 3 (3.1%)                                           |
| ST25           | 4 (3.2%)               | 2 (7.4%)                                            | 2 (2.0%)                                           |
| ST1633         | 4 (3.2%)               |                                                     | 4 (4.0%)                                           |
| MSSA ST88      | 4 (3.2%)               | 1 (3.7%)                                            | 3 (3.0%)                                           |
| MRSA ST88      | 3 (2.4%)               | 1 (3.7%)                                            | 2 (2.0%)                                           |
| ST1290         | 3 (2.4%)               |                                                     | 3 (3.0%)                                           |
| ST5            | 3 (2.4%)               | 1 (3.7%)                                            | 2 (2.0%)                                           |
| ST707          | 2 (1.6%)               |                                                     | 2 (2.0%)                                           |
| ST30           | 3 (2.4%)               | 1 (3.7%)                                            | 2 (2.0%)                                           |
| ST15           | 2 (1.6%)               |                                                     | 2 (2.0%)                                           |
| ST188          | 2 (1.6%)               |                                                     | 2 (2.0%)                                           |
| ST6            | 2 (1.6%)               |                                                     | 2 (2.0%)                                           |
| ST97           | 1 (0.8%)               |                                                     | 1 (1.0%)                                           |
| ST661          | 1 (0.8%)               |                                                     | 1 (1.0%)                                           |
| ST2430         | 1 (0.8%)               |                                                     | 1 (1.0%)                                           |
| ST101          | 1 (0.8%)               |                                                     | 1 (1.0%)                                           |
| ST1292         | 1 (0.8%)               |                                                     | 1 (1.0%)                                           |
| ST2126         | 1 (0.8%)               |                                                     | 1 (1.0%)                                           |
| ST573          | 1 (0.8%)               |                                                     | 1 (1.0%)                                           |
| Total          | <b>126</b>             | <b>27</b>                                           | <b>99</b>                                          |
